# Supplementary material
Source: PubMed Central journal article supplement (PMC515117)

**a.**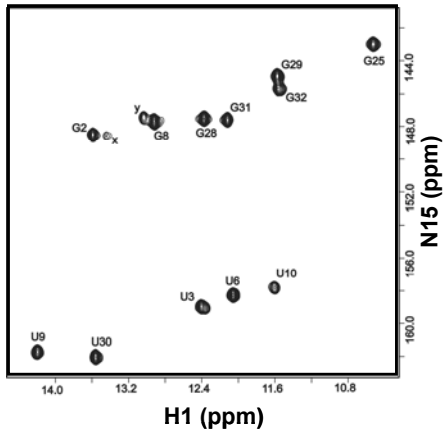**b.**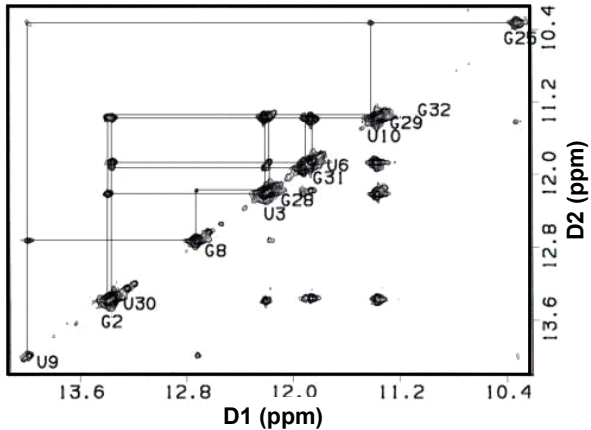

Supplement: pnas_101_34_12688__2.pdf [file pnas_101_34_12688__2.pdf]
